# Supplementary material for: Effects of Microencapsulated Blend of Organic Acids and Essential Oils as a Feed Additive on Quality of Chicken Breast Meat
Source: PubMed Central journal article supplement (PMC7222737; doi:10.3390/ani10040640), 2020-04-07
Supplement: animals-10-00640-s001.pdf [file animals-10-00640-s001.pdf]

# Effects of Microencapsulated Blend of Organic Acids and Essential Oils as a Feed Additive on Quality of Chicken Breast Meat

Alessandro Stamilla <sup>1</sup>, Nunziatina Russo <sup>1</sup>, Antonino Messina <sup>2</sup>, Carmine Spadaro <sup>1</sup>, Antonio Natalello <sup>1,\*</sup>, Cinzia Caggia <sup>1</sup>, Cinzia L. Randazzo <sup>1</sup> and Massimiliano Lanza <sup>1</sup>

<sup>1</sup> Dipartimento di Agricoltura, Alimentazione e Ambiente (Di3A), University of Catania, Via Valdisavoia, 5, 95123 Catania, Italy

<sup>2</sup> DVM consultant poultry specialists, via Cava Gucciardo Pirato, 12, 97015 Modica, Italy;

\* Correspondence: [antonio.natalello@unict.it](mailto:antonio.natalello@unict.it); Tel.: +39-095- 4783473 (A.N.)

**Supplementary Table S1.** Effect of dietary treatment on microbial counts (expressed as log<sub>10</sub> cfu/g) in raw meat during storage at refrigerated conditions.

| Microbial groups                 | Day 0     |           |                 | Day 4     |           |                 | Day 7     |           |                 | Day 11    |           |                 |
|----------------------------------|-----------|-----------|-----------------|-----------|-----------|-----------------|-----------|-----------|-----------------|-----------|-----------|-----------------|
|                                  | CON       | AVI       | <i>p</i> -Value | CON       | AVI       | <i>p</i> -Value | CON       | AVI       | <i>p</i> -Value | CON       | AVI       | <i>p</i> -Value |
| <i>Enterobacteriaceae</i>        | 3.98±0.03 | 4.03±0.81 | 0.876           | 6.39±1.11 | 6.78±0.21 | 0.364           | 7.71±1.30 | 8.32±0.65 | 0.274           | 9.68±0.27 | 9.63±0.37 | 0.768           |
| <i>Escherichia coli</i>          | 1.39±2.41 | 1.51±2.62 | 0.928           | 2.45±2.20 | 2.31±2.05 | 0.899           | 2.57±2.23 | 2.75±2.38 | 0.885           | 1.67±2.89 | <1        | 0.145           |
| Faecal coliforms                 | 1.55±2.69 | 2.54±2.38 | 0.468           | 2.69±2.45 | 3.27±1.11 | 0.568           | 2.61±2.27 | 2.58±2.26 | 0.975           | 7.30±0.22 | 7.18±0.53 | 0.583           |
| <i>Enterococcus</i> spp.         | 1.00±1.73 | 1.90±1.85 | 0.354           | 2.86±2.52 | 5.81±0.14 | 0.009           | 6.35±0.38 | 5.83±0.80 | 0.134           | 7.19±0.10 | 6.58±0.65 | 0.028           |
| Mesophilic bacteria              | 3.91±0.86 | 4.50±0.58 | 0.146           | 6.40±0.80 | 6.72±0.30 | 0.337           | 8.21±0.54 | 8.18±0.88 | 0.949           | 9.77±0.30 | 9.47±0.32 | 0.083           |
| Psychrotrophic bacteria          | 3.34±0.75 | 1.86±1.64 | 0.050           | 6.18±0.24 | 5.83±0.62 | 0.189           | 7.04±0.04 | 7.08±0.11 | 0.405           | 8.27±0.07 | 8.31±0.03 | 0.192           |
| Coagulase positive staphylococci | 3.28±0.75 | 3.35±0.23 | 0.799           | 5.48±0.96 | 5.75±0.11 | 0.463           | 6.44±0.64 | 6.04±1.01 | 0.387           | 7.01±0.40 | 4.52±3.94 | 0.116           |
| Coagulase negative staphylococci | 3.09±0.18 | 3.03±0.55 | 0.766           | 4.56±0.05 | 4.13±0.11 | 0.000           | 6.50±0.20 | 5.59±0.02 | 0.748           | 6.20±0.17 | 6.79±0.80 | 0.086           |
| Lactic Acid Bacteria             | 1.77±1.57 | 1.93±1.72 | 0.855           | 3.15±2.75 | 4.40±0.60 | 0.252           | 5.63±1.29 | 4.92±0.35 | 0.173           | 5.68±0.31 | 5.54±0.09 | 0.270           |
| <i>Lactococcus</i> spp.          | 1.49±2.59 | 1.20±2.08 | 0.815           | 5.41±1.11 | 5.73±0.23 | 0.448           | 5.50±0.20 | 6.16±0.58 | 0.014           | 5.67±0.32 | 5.53±0.40 | 0.488           |
| Yeasts/Moulds                    | 3.96±0.91 | 3.59±0.93 | 0.462           | 5.94±1.06 | 6.47±0.10 | 0.198           | 8.81±0.53 | 8.48±0.41 | 0.202           | 9.87±0.17 | 9.95±0.18 | 0.413           |

Values are means ± standard error of the mean.

Control (CON) basal diet; basal diet + 0.5% organic acids and essential oils (AVI).
